# Supplementary material for: Theoretical investigation of the electronic structure and photophysical properties of a series of Ir(iii) complexes bearing pentafluorosulfanyl groups
Source: Royal Society of Chemistry journal article supplement (doi:10.1039/c9nj01768b), 2019-01-01
Supplement: c9nj01768b1.pdf [file c9nj01768b1.pdf]

**Table S1** Frontier molecular orbital energies (eV) and compositions (%) in the ground state for complex **1**

| MO   | Energy | Contribution (%) |                       |                       |                       | Assignment                                                                                |
|------|--------|------------------|-----------------------|-----------------------|-----------------------|-------------------------------------------------------------------------------------------|
|      |        | Ir               | SF <sub>5</sub> -ppy1 | SF <sub>5</sub> -ppy2 | SF <sub>5</sub> -ppy3 |                                                                                           |
| L+10 | -0.33  | 4                | 46                    | 1                     | 50                    | $\pi^*(\text{SF}_5\text{-ppy1} + \text{SF}_5\text{-ppy3})$                                |
| L+9  | -0.39  | 4                | 34                    | 32                    | 31                    | $\pi^*(\text{SF}_5\text{-ppy1} + \text{SF}_5\text{-ppy2} + \text{SF}_5\text{-ppy3})$      |
| L+8  | -0.86  | 1                | 62                    | 25                    | 12                    | $\pi^*(\text{SF}_5\text{-ppy1} + \text{SF}_5\text{-ppy2})$                                |
| L+7  | -0.87  | 1                | 17                    | 27                    | 55                    | $\pi^*(\text{SF}_5\text{-ppy1} + \text{SF}_5\text{-ppy2} + \text{SF}_5\text{-ppy3})$      |
| L+6  | -0.87  | 0                | 24                    | 42                    | 34                    | $\pi^*(\text{SF}_5\text{-ppy1} + \text{SF}_5\text{-ppy2} + \text{SF}_5\text{-ppy3})$      |
| L+5  | -0.88  | 2                | 14                    | 38                    | 45                    | $\pi^*(\text{SF}_5\text{-ppy2} + \text{SF}_5\text{-ppy3})$                                |
| L+4  | -0.88  | 2                | 47                    | 32                    | 19                    | $\pi^*(\text{SF}_5\text{-ppy1} + \text{SF}_5\text{-ppy2} + \text{SF}_5\text{-ppy3})$      |
| L+3  | -1.15  | 2                | 33                    | 33                    | 33                    | $\pi^*(\text{SF}_5\text{-ppy1} + \text{SF}_5\text{-ppy2} + \text{SF}_5\text{-ppy3})$      |
| L+2  | -1.54  | 4                | 62                    | 8                     | 26                    | $\pi^*(\text{SF}_5\text{-ppy1} + \text{SF}_5\text{-ppy3})$                                |
| L+1  | -1.54  | 4                | 2                     | 55                    | 38                    | $\pi^*(\text{SF}_5\text{-ppy2} + \text{SF}_5\text{-ppy3})$                                |
| LUMO | -1.67  | 1                | 33                    | 33                    | 33                    | $\pi^*(\text{SF}_5\text{-ppy1} + \text{SF}_5\text{-ppy2} + \text{SF}_5\text{-ppy3})$      |
| HOMO | -6.03  | 51               | 16                    | 16                    | 17                    | d(Ir)+ $\pi(\text{SF}_5\text{-ppy1} + \text{SF}_5\text{-ppy2} + \text{SF}_5\text{-ppy3})$ |
| H-1  | -6.17  | 45               | 32                    | 10                    | 13                    | d(Ir)+ $\pi(\text{SF}_5\text{-ppy1})$                                                     |
| H-2  | -6.17  | 45               | 5                     | 27                    | 23                    | d(Ir)+ $\pi(\text{SF}_5\text{-ppy2} + \text{SF}_5\text{-ppy3})$                           |
| H-3  | -6.97  | 6                | 14                    | 19                    | 61                    | $\pi(\text{SF}_5\text{-ppy2} + \text{SF}_5\text{-ppy3})$                                  |
| H-4  | -6.98  | 6                | 48                    | 44                    | 2                     | $\pi(\text{SF}_5\text{-ppy1} + \text{SF}_5\text{-ppy2})$                                  |
| H-5  | -7.08  | 7                | 31                    | 31                    | 31                    | $\pi(\text{SF}_5\text{-ppy1} + \text{SF}_5\text{-ppy2} + \text{SF}_5\text{-ppy3})$        |
| H-6  | -7.64  | 10               | 30                    | 30                    | 30                    | $\pi(\text{SF}_5\text{-ppy1} + \text{SF}_5\text{-ppy2} + \text{SF}_5\text{-ppy3})$        |
| H-7  | -7.8   | 18               | 10                    | 27                    | 45                    | d(Ir)+ $\pi(\text{SF}_5\text{-ppy2} + \text{SF}_5\text{-ppy3})$                           |
| H-8  | -7.81  | 18               | 45                    | 27                    | 10                    | d(Ir)+ $\pi(\text{SF}_5\text{-ppy1} + \text{SF}_5\text{-ppy2})$                           |
| H-9  | -7.99  | 14               | 29                    | 29                    | 29                    | $\pi(\text{SF}_5\text{-ppy1} + \text{SF}_5\text{-ppy2} + \text{SF}_5\text{-ppy3})$        |
| H-10 | -8.27  | 10               | 17                    | 43                    | 30                    | $\pi(\text{SF}_5\text{-ppy1} + \text{SF}_5\text{-ppy2} + \text{SF}_5\text{-ppy3})$        |

**Table S2** Frontier molecular orbital energies (eV) and compositions (%) in the ground state for complex **2**

| MO   | Energy | Contribution (%) |                       |                       |     | Assignment                                                              |
|------|--------|------------------|-----------------------|-----------------------|-----|-------------------------------------------------------------------------|
|      |        | Ir               | SF <sub>5</sub> -ppy1 | SF <sub>5</sub> -ppy2 | thd |                                                                         |
| L+10 | 0.71   | 0                | 50                    | 50                    | 0   | $\pi^*(\text{SF}_5\text{-ppy1} + \text{SF}_5\text{-ppy2})$              |
| L+9  | 0.61   | 1                | 49                    | 49                    | 0   | $\pi^*(\text{SF}_5\text{-ppy1} + \text{SF}_5\text{-ppy2})$              |
| L+8  | -0.34  | 7                | 46                    | 46                    | 1   | $\pi^*(\text{SF}_5\text{-ppy1} + \text{SF}_5\text{-ppy2})$              |
| L+7  | -0.49  | 2                | 49                    | 49                    | 0   | $\pi^*(\text{SF}_5\text{-ppy1} + \text{SF}_5\text{-ppy2})$              |
| L+6  | -0.88  | 0                | 50                    | 50                    | 0   | $\pi^*(\text{SF}_5\text{-ppy1} + \text{SF}_5\text{-ppy2})$              |
| L+5  | -0.88  | 0                | 49                    | 49                    | 1   | $\pi^*(\text{SF}_5\text{-ppy1} + \text{SF}_5\text{-ppy2})$              |
| L+4  | -0.91  | 2                | 1                     | 1                     | 96  | $\pi^*(\text{thd})$                                                     |
| L+3  | -0.96  | 2                | 49                    | 49                    | 0   | $\pi^*(\text{SF}_5\text{-ppy1} + \text{SF}_5\text{-ppy2})$              |
| L+2  | -1.08  | 3                | 48                    | 48                    | 0   | $\pi^*(\text{SF}_5\text{-ppy1} + \text{SF}_5\text{-ppy2})$              |
| L+1  | -1.65  | 4                | 48                    | 48                    | 1   | $\pi^*(\text{SF}_5\text{-ppy1} + \text{SF}_5\text{-ppy2})$              |
| LUMO | -1.7   | 4                | 48                    | 48                    | 1   | $\pi^*(\text{SF}_5\text{-ppy1} + \text{SF}_5\text{-ppy2})$              |
| HOMO | -5.9   | 45               | 24                    | 24                    | 6   | $d(\text{Ir}) + \pi(\text{SF}_5\text{-ppy1} + \text{SF}_5\text{-ppy2})$ |
| H-1  | -6.06  | 30               | 3                     | 3                     | 64  | $d(\text{Ir}) + \pi(\text{thd})$                                        |
| H-2  | -6.69  | 68               | 12                    | 12                    | 8   | $d(\text{Ir})$                                                          |
| H-3  | -6.85  | 6                | 44                    | 44                    | 6   | $\pi(\text{SF}_5\text{-ppy1} + \text{SF}_5\text{-ppy2})$                |
| H-4  | -6.94  | 12               | 15                    | 15                    | 58  | $\pi(\text{SF}_5\text{-ppy1} + \text{SF}_5\text{-ppy2} + \text{thd})$   |
| H-5  | -7.11  | 8                | 45                    | 45                    | 2   | $\pi(\text{SF}_5\text{-ppy1} + \text{SF}_5\text{-ppy2})$                |
| H-6  | -7.22  | 26               | 11                    | 11                    | 52  | $d(\text{Ir}) + \pi(\text{thd})$                                        |
| H-7  | -7.43  | 1                | 47                    | 47                    | 5   | $\pi(\text{SF}_5\text{-ppy1} + \text{SF}_5\text{-ppy2})$                |
| H-8  | -7.95  | 6                | 17                    | 17                    | 59  | $\pi(\text{SF}_5\text{-ppy1} + \text{SF}_5\text{-ppy2} + \text{thd})$   |
| H-9  | -8.39  | 18               | 37                    | 37                    | 9   | $d(\text{Ir}) + \pi(\text{SF}_5\text{-ppy1} + \text{SF}_5\text{-ppy2})$ |
| H-10 | -8.69  | 1                | 49                    | 49                    | 2   | $\pi(\text{SF}_5\text{-ppy1} + \text{SF}_5\text{-ppy2})$                |

**Table S3** Frontier molecular orbital energies (eV) and compositions (%) in the ground state for complex **3**

| MO   | Energy | Contribution (%) |                       |                       |     | Assignment                                                                           |
|------|--------|------------------|-----------------------|-----------------------|-----|--------------------------------------------------------------------------------------|
|      |        | Ir               | SF <sub>5</sub> -ppy1 | SF <sub>5</sub> -ppy2 | ptd |                                                                                      |
| L+10 | 0.45   | 9                | 1                     | 3                     | 87  | $\pi^*(\text{ptd})$                                                                  |
| L+9  | -0.11  | 0                | 0                     | 1                     | 99  | $\pi^*(\text{ptd})$                                                                  |
| L+8  | -0.42  | 7                | 47                    | 45                    | 1   | $\pi^*(\text{SF}_5\text{-ppy1} + \text{SF}_5\text{-ppy2})$                           |
| L+7  | -0.56  | 3                | 47                    | 49                    | 1   | $\pi^*(\text{SF}_5\text{-ppy1} + \text{SF}_5\text{-ppy2})$                           |
| L+6  | -0.91  | 0                | 98                    | 2                     | 0   | $\pi^*(\text{SF}_5\text{-ppy1})$                                                     |
| L+5  | -0.91  | 0                | 2                     | 98                    | 0   | $\pi^*(\text{SF}_5\text{-ppy2})$                                                     |
| L+4  | -1.02  | 2                | 49                    | 48                    | 0   | $\pi^*(\text{SF}_5\text{-ppy1} + \text{SF}_5\text{-ppy2})$                           |
| L+3  | -1.16  | 3                | 47                    | 48                    | 3   | $\pi^*(\text{SF}_5\text{-ppy1} + \text{SF}_5\text{-ppy2})$                           |
| L+2  | -1.16  | 2                | 2                     | 1                     | 95  | $\pi^*(\text{ptd})$                                                                  |
| L+1  | -1.72  | 4                | 49                    | 46                    | 1   | $\pi^*(\text{SF}_5\text{-ppy1} + \text{SF}_5\text{-ppy2})$                           |
| LUMO | -1.78  | 4                | 46                    | 49                    | 1   | $\pi^*(\text{SF}_5\text{-ppy1} + \text{SF}_5\text{-ppy2})$                           |
| HOMO | -6.04  | 33               | 15                    | 16                    | 36  | $d(\text{Ir}) + \pi(\text{SF}_5\text{-ppy1} + \text{SF}_5\text{-ppy2} + \text{ptd})$ |
| H-1  | -6.05  | 29               | 13                    | 11                    | 46  | $d(\text{Ir}) + \pi(\text{ptd})$                                                     |
| H-2  | -6.84  | 65               | 9                     | 18                    | 8   | $d(\text{Ir}) + \pi(\text{SF}_5\text{-ppy2})$                                        |
| H-3  | -6.91  | 12               | 46                    | 36                    | 5   | $\pi(\text{SF}_5\text{-ppy1} + \text{SF}_5\text{-ppy2})$                             |
| H-4  | -7.07  | 32               | 18                    | 20                    | 30  | $d(\text{Ir}) + \pi(\text{SF}_5\text{-ppy1} + \text{SF}_5\text{-ppy2} + \text{ptd})$ |
| H-5  | -7.19  | 9                | 44                    | 45                    | 2   | $\pi(\text{SF}_5\text{-ppy1} + \text{SF}_5\text{-ppy2})$                             |
| H-6  | -7.33  | 12               | 9                     | 8                     | 72  | $\pi(\text{ptd})$                                                                    |
| H-7  | -7.5   | 2                | 46                    | 44                    | 8   | $\pi(\text{SF}_5\text{-ppy1} + \text{SF}_5\text{-ppy2})$                             |
| H-8  | -7.91  | 1                | 3                     | 3                     | 93  | $\pi(\text{ptd})$                                                                    |
| H-9  | -7.95  | 3                | 7                     | 6                     | 84  | $\pi(\text{ptd})$                                                                    |
| H-10 | -8.43  | 10               | 24                    | 27                    | 39  | $\pi(\text{SF}_5\text{-ppy1} + \text{SF}_5\text{-ppy2} + \text{ptd})$                |

**Table S4** Frontier molecular orbital energies (eV) and compositions (%) in the ground state for complex **4**

| MO   | Energy | Contribution (%) |                       |                       |     | Assignment                                                                           |
|------|--------|------------------|-----------------------|-----------------------|-----|--------------------------------------------------------------------------------------|
|      |        | Ir               | SF <sub>5</sub> -ppy1 | SF <sub>5</sub> -ppy2 | ntd |                                                                                      |
| L+10 | 0.29   | 3                | 3                     | 1                     | 93  | $\pi^*(\text{ntd})$                                                                  |
| L+9  | -0.41  | 7                | 47                    | 46                    | 1   | $\pi^*(\text{SF}_5\text{-ppy1} + \text{SF}_5\text{-ppy2})$                           |
| L+8  | -0.56  | 3                | 47                    | 48                    | 1   | $\pi^*(\text{SF}_5\text{-ppy1} + \text{SF}_5\text{-ppy2})$                           |
| L+7  | -0.91  | 0                | 16                    | 84                    | 0   | $\pi^*(\text{SF}_5\text{-ppy1} + \text{SF}_5\text{-ppy2})$                           |
| L+6  | -0.91  | 0                | 84                    | 16                    | 0   | $\pi^*(\text{SF}_5\text{-ppy1} + \text{SF}_5\text{-ppy2})$                           |
| L+5  | -1.03  | 2                | 45                    | 53                    | 0   | $\pi^*(\text{SF}_5\text{-ppy1} + \text{SF}_5\text{-ppy2})$                           |
| L+4  | -1.16  | 3                | 53                    | 44                    | 1   | $\pi^*(\text{SF}_5\text{-ppy1} + \text{SF}_5\text{-ppy2})$                           |
| L+3  | -1.71  | 4                | 48                    | 46                    | 1   | $\pi^*(\text{SF}_5\text{-ppy1} + \text{SF}_5\text{-ppy2})$                           |
| L+2  | -1.79  | 4                | 40                    | 45                    | 11  | $\pi^*(\text{SF}_5\text{-ppy1} + \text{SF}_5\text{-ppy2})$                           |
| L+1  | -1.87  | 2                | 7                     | 4                     | 87  | $\pi^*(\text{ntd})$                                                                  |
| LUMO | -2.11  | 1                | 1                     | 0                     | 99  | $\pi^*(\text{ntd})$                                                                  |
| HOMO | -6.02  | 42               | 24                    | 24                    | 9   | $d(\text{Ir}) + \pi(\text{SF}_5\text{-ppy1} + \text{SF}_5\text{-ppy2})$              |
| H-1  | -6.23  | 27               | 5                     | 4                     | 64  | $d(\text{Ir}) + \pi(\text{ntd})$                                                     |
| H-2  | -6.86  | 58               | 8                     | 27                    | 7   | $d(\text{Ir}) + \pi(\text{SF}_5\text{-ppy2})$                                        |
| H-3  | -6.95  | 10               | 52                    | 32                    | 6   | $\pi(\text{SF}_5\text{-ppy1} + \text{SF}_5\text{-ppy2})$                             |
| H-4  | -7.07  | 28               | 16                    | 21                    | 35  | $d(\text{Ir}) + \pi(\text{SF}_5\text{-ppy1} + \text{SF}_5\text{-ppy2} + \text{ntd})$ |
| H-5  | -7.21  | 14               | 39                    | 43                    | 4   | $\pi(\text{SF}_5\text{-ppy1} + \text{SF}_5\text{-ppy2})$                             |
| H-6  | -7.48  | 8                | 41                    | 41                    | 9   | $\pi(\text{SF}_5\text{-ppy1} + \text{SF}_5\text{-ppy2})$                             |
| H-7  | -7.62  | 5                | 17                    | 12                    | 66  | $\pi(\text{SF}_5\text{-ppy1} + \text{ntd})$                                          |
| H-8  | -7.93  | 2                | 1                     | 3                     | 94  | $\pi(\text{ntd})$                                                                    |
| H-9  | -8.23  | 2                | 7                     | 6                     | 85  | $\pi(\text{ntd})$                                                                    |
| H-10 | -8.39  | 9                | 22                    | 22                    | 46  | $\pi(\text{SF}_5\text{-ppy1} + \text{SF}_5\text{-ppy2} + \text{ntd})$                |

**Table S5** Frontier molecular orbital energies (eV) and compositions (%) in the ground state for complex **5**

| MO   | Energy | Contribution (%) |                       |                       |      | Assignment                                                              |
|------|--------|------------------|-----------------------|-----------------------|------|-------------------------------------------------------------------------|
|      |        | Ir               | SF <sub>5</sub> -ppy1 | SF <sub>5</sub> -ppy2 | tpip |                                                                         |
| L+10 | -0.29  | 1                | 3                     | 1                     | 96   | $\pi^*(\text{tpip})$                                                    |
| L+9  | -0.37  | 7                | 40                    | 49                    | 4    | $\pi^*(\text{SF}_5\text{-ppy1} + \text{SF}_5\text{-ppy2})$              |
| L+8  | -0.5   | 2                | 51                    | 45                    | 2    | $\pi^*(\text{SF}_5\text{-ppy1} + \text{SF}_5\text{-ppy2})$              |
| L+7  | -0.85  | 0                | 2                     | 5                     | 92   | $\pi^*(\text{tpip})$                                                    |
| L+6  | -0.89  | 0                | 95                    | 5                     | 0    | $\pi^*(\text{SF}_5\text{-ppy1})$                                        |
| L+5  | -0.89  | 0                | 4                     | 95                    | 0    | $\pi^*(\text{SF}_5\text{-ppy2})$                                        |
| L+4  | -0.9   | 0                | 7                     | 1                     | 91   | $\pi^*(\text{tpip})$                                                    |
| L+3  | -0.92  | 2                | 33                    | 52                    | 12   | $\pi^*(\text{SF}_5\text{-ppy1} + \text{SF}_5\text{-ppy2})$              |
| L+2  | -1.08  | 3                | 55                    | 38                    | 4    | $\pi^*(\text{SF}_5\text{-ppy1} + \text{SF}_5\text{-ppy2})$              |
| L+1  | -1.63  | 5                | 31                    | 63                    | 1    | $\pi^*(\text{SF}_5\text{-ppy1} + \text{SF}_5\text{-ppy2})$              |
| LUMO | -1.71  | 4                | 62                    | 32                    | 2    | $\pi^*(\text{SF}_5\text{-ppy1} + \text{SF}_5\text{-ppy2})$              |
| HOMO | -5.9   | 46               | 24                    | 24                    | 6    | $d(\text{Ir}) + \pi(\text{SF}_5\text{-ppy1} + \text{SF}_5\text{-ppy2})$ |
| H-1  | -6.45  | 62               | 10                    | 12                    | 16   | $d(\text{Ir}) + \pi(\text{tpip})$                                       |
| H-2  | -6.49  | 64               | 11                    | 8                     | 17   | $d(\text{Ir}) + \pi(\text{tpip})$                                       |
| H-3  | -6.86  | 0                | 26                    | 32                    | 42   | $\pi(\text{SF}_5\text{-ppy1} + \text{SF}_5\text{-ppy2} + \text{tpip})$  |
| H-4  | -6.91  | 6                | 22                    | 15                    | 57   | $\pi(\text{SF}_5\text{-ppy1} + \text{SF}_5\text{-ppy2} + \text{tpip})$  |
| H-5  | -7.08  | 4                | 36                    | 42                    | 18   | $\pi(\text{SF}_5\text{-ppy1} + \text{SF}_5\text{-ppy2} + \text{tpip})$  |
| H-6  | -7.11  | 5                | 5                     | 5                     | 85   | $\pi(\text{tpip})$                                                      |
| H-7  | -7.22  | 1                | 1                     | 0                     | 98   | $\pi(\text{tpip})$                                                      |
| H-8  | -7.28  | 0                | 1                     | 1                     | 98   | $\pi(\text{tpip})$                                                      |
| H-9  | -7.36  | 0                | 2                     | 2                     | 96   | $\pi(\text{tpip})$                                                      |
| H-10 | -7.37  | 0                | 3                     | 1                     | 95   | $\pi(\text{tpip})$                                                      |

**Table S6** Selected calculated wavelength (nm) /energies (eV), oscillator strength ( $f$ ), major contribution and transition characters for **1–5** in MeCN media from TDDFT. H indicates HOMO, L indicates LUMO

|                 | State           | $\lambda/E$ | $f$            | Configuration                                                                                                                                                        | Assignment                                                                                                                                                                  | Nature         | Exptl. <sup>a</sup> |  |
|-----------------|-----------------|-------------|----------------|----------------------------------------------------------------------------------------------------------------------------------------------------------------------|-----------------------------------------------------------------------------------------------------------------------------------------------------------------------------|----------------|---------------------|--|
| <b>1</b>        | S <sub>1</sub>  | 366/3.39    | 0.0144         | H→L (96%)                                                                                                                                                            | d(Ir)+ $\pi$ (SF <sub>5</sub> -ppy1+SF <sub>5</sub> -ppy2+SF <sub>5</sub> -ppy3) $\rightarrow$ $\pi^*$ (SF <sub>5</sub> -ppy1+SF <sub>5</sub> -ppy2 +SF <sub>5</sub> -ppy3) | MLCT/LLCT/ILCT | 363                 |  |
|                 | S <sub>24</sub> | 265/4.69    | 0.2459         | H-3→L+2 (19%)                                                                                                                                                        | $\pi$ (SF <sub>5</sub> -ppy2+SF <sub>5</sub> -ppy3) $\rightarrow$ $\pi^*$ (SF <sub>5</sub> -ppy1+SF <sub>5</sub> -ppy3)                                                     | LLCT/ILCT      |                     |  |
|                 |                 |             |                | H-4→L+1 (18%)                                                                                                                                                        | $\pi$ (SF <sub>5</sub> -ppy1 + SF <sub>5</sub> -ppy2) $\rightarrow$ $\pi^*$ ( SF <sub>5</sub> -ppy2 + SF <sub>5</sub> -ppy3)                                                |                |                     |  |
|                 | S <sub>30</sub> | 262/4.73    | 0.1953         | H-5→L (35%)                                                                                                                                                          | $\pi$ (SF <sub>5</sub> -ppy1+SF <sub>5</sub> -ppy2+SF <sub>5</sub> -ppy3) $\rightarrow$ $\pi^*$ (SF <sub>5</sub> -ppy1+SF <sub>5</sub> -ppy2+ SF <sub>5</sub> -ppy3)        | LLCT/ILCT      |                     |  |
|                 | S <sub>40</sub> | 254/4.88    | 0.1899         | H-2→L+9 (52%)                                                                                                                                                        | d(Ir)+ $\pi$ (SF <sub>5</sub> -ppy2+SF <sub>5</sub> -ppy3) $\rightarrow$ $\pi^*$ (SF <sub>5</sub> -ppy1+SF <sub>5</sub> -ppy2+ SF <sub>5</sub> -ppy3)                       | MLCT/LLCT/ILCT |                     |  |
|                 | S <sub>44</sub> | 250/4.96    | 0.1963         | H-2→L+10 (35%),                                                                                                                                                      | d(Ir)+ $\pi$ (SF <sub>5</sub> -ppy2+SF <sub>5</sub> -ppy3) $\rightarrow$ $\pi^*$ (SF <sub>5</sub> -ppy1+SF <sub>5</sub> -ppy3)                                              | MLCT/LLCT/ILCT |                     |  |
|                 |                 |             |                | H-1→L+11 (35%)                                                                                                                                                       | d(Ir)+ $\pi$ (SF <sub>5</sub> -ppy1) $\rightarrow$ $\pi^*$ (SF <sub>5</sub> -ppy1+SF <sub>5</sub> -ppy2+SF <sub>5</sub> -ppy3)                                              |                |                     |  |
| S <sub>51</sub> | 239/5.20        | 0.2068      | H-9→L (28%),   | $\pi$ (SF <sub>5</sub> -ppy1+SF <sub>5</sub> -ppy2+SF <sub>5</sub> -ppy3) $\rightarrow$ $\pi^*$ (SF <sub>5</sub> -ppy1+SF <sub>5</sub> -ppy2+ SF <sub>5</sub> -ppy3) | LLCT/ILCT                                                                                                                                                                   |                |                     |  |
| <b>2</b>        | S <sub>1</sub>  | 387/3.20    | 0.0537         | H→L (95%)                                                                                                                                                            | d(Ir)+ $\pi$ (SF <sub>5</sub> -ppy1+SF <sub>5</sub> -ppy2) $\rightarrow$ $\pi^*$ (SF <sub>5</sub> -ppy1+SF <sub>5</sub> -ppy2)                                              | MLCT/LLCT/ILCT |                     |  |
|                 | S <sub>19</sub> | 275/4.52    | 0.1754         | H→L+7 (62%)                                                                                                                                                          | d(Ir)+ $\pi$ (SF <sub>5</sub> -ppy1+SF <sub>5</sub> -ppy2) $\rightarrow$ $\pi^*$ (SF <sub>5</sub> -ppy1+SF <sub>5</sub> -ppy2)                                              | MLCT/LLCT/ILCT |                     |  |
|                 | S <sub>30</sub> | 260/4.77    | 0.2034         | H-1→L+8 (30%)                                                                                                                                                        | d(Ir)+ $\pi$ (thd) $\rightarrow$ $\pi^*$ ( SF <sub>5</sub> -ppy1+SF <sub>5</sub> -ppy2)                                                                                     | MLCT/LLCT      |                     |  |
|                 |                 |             |                | H-6→L+1 (21%)                                                                                                                                                        | d(Ir)+ $\pi$ (thd) $\rightarrow$ $\pi^*$ (SF <sub>5</sub> -ppy1+SF <sub>5</sub> -ppy2)                                                                                      |                |                     |  |
|                 | S <sub>38</sub> | 240/5.16    | 0.1358         | H-4→L+3 (52%)                                                                                                                                                        | $\pi$ (SF <sub>5</sub> -ppy1+SF <sub>5</sub> -ppy2+thd) $\rightarrow$ $\pi^*$ ( SF <sub>5</sub> -ppy1+SF <sub>5</sub> -ppy2)                                                | LLCT/ILCT      |                     |  |
|                 | S <sub>41</sub> | 239/5.19    | 0.2598         | H-3→L+4 (35%)                                                                                                                                                        | $\pi$ (SF <sub>5</sub> -ppy1+SF <sub>5</sub> -ppy2) $\rightarrow$ $\pi^*$ (thd)                                                                                             | LLCT           |                     |  |
|                 |                 |             |                | H-3→L+3 (26%)                                                                                                                                                        | $\pi$ (SF <sub>5</sub> -ppy1+SF <sub>5</sub> -ppy2) $\rightarrow$ $\pi^*$ (SF <sub>5</sub> -ppy1+SF <sub>5</sub> -ppy2)                                                     |                |                     |  |
| S <sub>53</sub> | 229/5.42        | 0.0606      | H→L+12 (43%)   | d(Ir)+ $\pi$ (SF <sub>5</sub> -ppy1+SF <sub>5</sub> -ppy2) $\rightarrow$ d(Ir)                                                                                       | MLCT                                                                                                                                                                        |                |                     |  |
| <b>3</b>        | S <sub>1</sub>  | 381/3.26    | 0.0552         | H→L (61%)                                                                                                                                                            | d(Ir)+ $\pi$ (SF <sub>5</sub> -ppy1+SF <sub>5</sub> -ppy2+ptd) $\rightarrow$ $\pi^*$ (SF <sub>5</sub> -ppy1+SF <sub>5</sub> -ppy2)                                          | MLCT/LLCT/ILCT |                     |  |
|                 | S <sub>18</sub> | 277/4.48    | 0.1535         | H-1→L (34%)                                                                                                                                                          | d(Ir)+ $\pi$ (ptd) $\rightarrow$ $\pi^*$ (SF <sub>5</sub> -ppy1+SF <sub>5</sub> -ppy2)                                                                                      | MLCT/LLCT/ILCT |                     |  |
|                 |                 |             |                | H-4→L+1 (55%)                                                                                                                                                        | d(Ir)+ $\pi$ (SF <sub>5</sub> -ppy1+SF <sub>5</sub> -ppy2+ptd) $\rightarrow$ $\pi^*$ (SF <sub>5</sub> -ppy1+SF <sub>5</sub> -ppy2)                                          |                |                     |  |
|                 | S <sub>23</sub> | 266/4.67    | 0.1464         | H-5→L (22%)                                                                                                                                                          | $\pi$ (SF <sub>5</sub> -ppy1+SF <sub>5</sub> -ppy2) $\rightarrow$ $\pi^*$ (SF <sub>5</sub> -ppy1+SF <sub>5</sub> -ppy2)                                                     | LLCT/ILCT      |                     |  |
|                 |                 |             |                | H-2→L+2 (22%)                                                                                                                                                        | d(Ir)+ $\pi$ (SF <sub>5</sub> -ppy2) $\rightarrow$ $\pi^*$ (ptd)                                                                                                            |                |                     |  |
|                 | S <sub>37</sub> | 245/5.06    | 0.1331         | H-1→L+9 (25%)                                                                                                                                                        | d(Ir)+ $\pi$ (ptd) $\rightarrow$ $\pi^*$ (ptd)                                                                                                                              | MLCT/ILCT      |                     |  |
|                 |                 |             |                | H→L+9 (21%)                                                                                                                                                          | d(Ir)+ $\pi$ (SF <sub>5</sub> -ppy1+SF <sub>5</sub> -ppy2+ptd) $\rightarrow$ $\pi^*$ (ptd)                                                                                  |                |                     |  |
| S <sub>40</sub> | 241/5.15        | 0.3135      | H-3→L+4 (37%)  | $\pi$ (SF <sub>5</sub> -ppy1+SF <sub>5</sub> -ppy2) $\rightarrow$ $\pi^*$ (SF <sub>5</sub> -ppy1+SF <sub>5</sub> -ppy2)                                              | LLCT/ILCT                                                                                                                                                                   |                |                     |  |
|                 |                 |             | H-4→L+4 (15%)  | d(Ir)+ $\pi$ (SF <sub>5</sub> -ppy1+SF <sub>5</sub> -ppy2+ptd) $\rightarrow$ $\pi^*$ (SF <sub>5</sub> -ppy1+SF <sub>5</sub> -ppy2)                                   |                                                                                                                                                                             |                |                     |  |
| S <sub>50</sub> | 233/5.32        | 0.0979      | H→L+14 (23%)   | d(Ir)+ $\pi$ (SF <sub>5</sub> -ppy1+SF <sub>5</sub> -ppy2+ptd) $\rightarrow$ d(Ir)+ $\pi^*$ (SF <sub>5</sub> -ppy1+SF <sub>5</sub> -ppy2)                            | MLCT/LLCT/ILCT                                                                                                                                                              |                |                     |  |
|                 |                 |             | H-1→L+14 (17%) | d(Ir)+ $\pi$ (ptd) $\rightarrow$ d(Ir)+ $\pi^*$ (SF <sub>5</sub> -ppy1+SF <sub>5</sub> -ppy2)                                                                        |                                                                                                                                                                             |                |                     |  |
| <b>4</b>        | S <sub>1</sub>  | 392/3.16    | 0.0226         | H→L+1 (53%)                                                                                                                                                          | d(Ir)+ $\pi$ (SF <sub>5</sub> -ppy1+SF <sub>5</sub> -ppy2) $\rightarrow$ $\pi^*$ (ntd)                                                                                      | MLCT/LLCT      |                     |  |
|                 | S <sub>9</sub>  | 317/3.91    | 0.1001         | H→L (43%)                                                                                                                                                            | d(Ir)+ $\pi$ (SF <sub>5</sub> -ppy1+SF <sub>5</sub> -ppy2) $\rightarrow$ $\pi^*$ (ntd)                                                                                      | MLCT/LLCT      |                     |  |
|                 |                 |             |                | H-2→L (22%)                                                                                                                                                          | d(Ir)+ $\pi$ (SF <sub>5</sub> -ppy2) $\rightarrow$ $\pi^*$ (ntd)                                                                                                            |                |                     |  |
|                 | S <sub>33</sub> | 265/4.68    | 0.1317         | H-5→L+1 (18%)                                                                                                                                                        | $\pi$ (SF <sub>5</sub> -ppy1+SF <sub>5</sub> -ppy2) $\rightarrow$ $\pi^*$ (ntd)                                                                                             | LLCT           |                     |  |
|                 |                 |             |                | H-5→L+2 (18%)                                                                                                                                                        | $\pi$ (SF <sub>5</sub> -ppy1+SF <sub>5</sub> -ppy2) $\rightarrow$ $\pi^*$ (SF <sub>5</sub> -ppy1+SF <sub>5</sub> -ppy2)                                                     |                |                     |  |
|                 | S <sub>36</sub> | 259/4.79    | 0.1569         | H-2→L+4 (50%)                                                                                                                                                        | d(Ir)+ $\pi$ (SF <sub>5</sub> -ppy2) $\rightarrow$ $\pi^*$ (SF <sub>5</sub> -ppy1+SF <sub>5</sub> -ppy2)                                                                    | MLCT/LLCT/ILCT |                     |  |
|                 | S <sub>46</sub> | 250/4.96    | 0.1011         | H-2→L+5 (21%)                                                                                                                                                        | d(Ir)+ $\pi$ (SF <sub>5</sub> -ppy2) $\rightarrow$ $\pi^*$ ( SF <sub>5</sub> -ppy1+SF <sub>5</sub> -ppy2)                                                                   | MLCT/LLCT/ILCT |                     |  |
| H-6→L+3 (18%)   |                 |             |                | $\pi$ (SF <sub>5</sub> -ppy1+SF <sub>5</sub> -ppy2) $\rightarrow$ $\pi^*$ (SF <sub>5</sub> -ppy1+SF <sub>5</sub> -ppy2)                                              |                                                                                                                                                                             |                |                     |  |
| S <sub>54</sub> | 238/5.22        | 0.2003      | H-3→L+5 (28%)  | $\pi$ (SF <sub>5</sub> -ppy1+SF <sub>5</sub> -ppy2) $\rightarrow$ $\pi^*$ (SF <sub>5</sub> -ppy1+SF <sub>5</sub> -ppy2)                                              | LLCT/ILCT                                                                                                                                                                   |                |                     |  |
|                 |                 |             | H-4→L+5 (13%)  | d(Ir)+ $\pi$ (SF <sub>5</sub> -ppy1+SF <sub>5</sub> -ppy2+ntd) $\rightarrow$ $\pi^*$ (SF <sub>5</sub> -ppy1+SF <sub>5</sub> -ppy2)                                   |                                                                                                                                                                             |                |                     |  |

|   |                 |          |        |               |                                                                                                      |                |
|---|-----------------|----------|--------|---------------|------------------------------------------------------------------------------------------------------|----------------|
| 5 | S <sub>1</sub>  | 389/3.19 | 0.0454 | H→L (94%)     | d(Ir)+π(SF <sub>5</sub> -ppy1+SF <sub>5</sub> -ppy2)→π*(SF <sub>5</sub> -ppy1+SF <sub>5</sub> -ppy2) | MLCT/LLCT/ILCT |
|   | S <sub>5</sub>  | 327/3.79 | 0.1102 | H-2→L (48%)   | d(Ir)+π(tpip)→π*(SF <sub>5</sub> -ppy1+SF <sub>5</sub> -ppy2)                                        | MLCT/LLCT      |
|   |                 |          |        | H-1→L+1 (44%) | d(Ir)+π(tpip)→π*(SF <sub>5</sub> -ppy1+SF <sub>5</sub> -ppy2)                                        |                |
|   | S <sub>17</sub> | 275/4.51 | 0.1205 | H→L+8 (43%)   | d(Ir)+π(SF <sub>5</sub> -ppy1+SF <sub>5</sub> -ppy2)→π*(SF <sub>5</sub> -ppy1+SF <sub>5</sub> -ppy2) | MLCT/LLCT/ILCT |
|   | S <sub>23</sub> | 261/4.74 | 0.2310 | H-5→L (41%)   | π(SF <sub>5</sub> -ppy1+SF <sub>5</sub> -ppy2+tpip)→π*(SF <sub>5</sub> -ppy1+SF <sub>5</sub> -ppy2)  | LLCT/ILCT      |
|   | S <sub>30</sub> | 254/4.88 | 0.0497 | H-1→L+9 (35%) | d(Ir)+π(tpip)→π*(SF <sub>5</sub> -ppy1+SF <sub>5</sub> -ppy2)                                        | MLCT/LLCT      |
|   | S <sub>51</sub> | 242/5.13 | 0.0628 | H-3→L+2 (35%) | π(SF <sub>5</sub> -ppy1+SF <sub>5</sub> -ppy2+tpip)→π*(SF <sub>5</sub> -ppy1+SF <sub>5</sub> -ppy2)  | LLCT/ILCT      |

<sup>a</sup> Ref. 18

**Table S7** Partial frontier molecular orbital composition (%) of complexes **1–5** in the triplet excited states. (H and L indicate HOMO and LUMO, respectively)

|          | MO | Energy/eV | MO composition (%) |             |                  | Assignment                        |
|----------|----|-----------|--------------------|-------------|------------------|-----------------------------------|
|          |    |           | Ir                 | Main ligand | Ancillary ligand |                                   |
| <b>1</b> | L  | -1.96     | 3                  | 94          | 3                | π*(SF <sub>5</sub> -ppy)          |
|          | H  | -5.92     | 42                 | 47          | 10               | d(Ir)+π(SF <sub>5</sub> -ppy)     |
| <b>2</b> | L  | -2.00     | 4                  | 95          | 1                | π*(SF <sub>5</sub> -ppy)          |
|          | H  | -5.78     | 41                 | 48          | 11               | d(Ir)+π(SF <sub>5</sub> -ppy)     |
| <b>3</b> | L  | -2.09     | 5                  | 95          | 1                | π*(SF <sub>5</sub> -ppy)          |
|          | H  | -5.92     | 36                 | 46          | 18               | d(Ir)+π(SF <sub>5</sub> -ppy+ptd) |
| <b>4</b> | L  | -2.45     | 1                  | 0           | 99               | π*(ntd)                           |
|          | H  | -6.04     | 43                 | 49          | 7                | d(Ir)+π(SF <sub>5</sub> -ppy)     |
| <b>5</b> | L  | -1.99     | 4                  | 94          | 1                | π*(SF <sub>5</sub> -ppy)          |
|          | H  | -5.82     | 43                 | 52          | 5                | d(Ir)+π(SF <sub>5</sub> -ppy)     |

**Table S8** The xyz coordinates for the optimized structures for **1** in the  $S_0$  and  $T_1$  states at PBE0/6-31G(d,p) level

|    | $S_0$       |   |             | $T_1$       |             |             |             |
|----|-------------|---|-------------|-------------|-------------|-------------|-------------|
| Ir | 0.00285000  | - | -0.00015700 | 1.14207800  | -0.02957400 | -0.00367900 | 1.11633600  |
| S  | 3.00619400  |   | -5.01301300 | -1.94640900 | 3.45630200  | 4.72417200  | -1.91530500 |
| F  | -4.41969400 |   | -4.23400600 | -2.07650000 | 4.79049300  | 3.81602200  | -2.03416400 |
| F  | -3.49008800 | - | -5.65463100 | -0.53964400 | 3.98192300  | 5.31005500  | -0.50019800 |
| F  | 1.66820000  |   | -5.92449600 | -1.89118900 | 2.20757200  | 5.75394500  | -1.86765900 |
| F  | -2.59700000 |   | -4.50345700 | -3.42780800 | 3.01519000  | 4.25964900  | -3.40157600 |
| F  | -3.72897900 |   | -6.26951700 | -2.67012900 | 4.29988000  | 5.91001100  | -2.62514000 |
| S  | 5.84491900  |   | -0.08539300 | -1.95672100 | -5.85368300 | 0.49963300  | -1.98957700 |
| F  | 5.88158300  |   | -1.69888700 | -2.08580800 | -5.77739700 | 2.11252100  | -2.10479000 |
| F  | 6.64458600  |   | -0.18072500 | -0.55114100 | -6.64356800 | 0.63883600  | -0.58248900 |
| F  | 5.96005300  |   | 1.52951400  | -1.90167500 | -6.07845000 | -1.10343300 | -1.94648800 |
| F  | 5.19651200  |   | 0.01134300  | -3.43710500 | -5.21244800 | 0.36939200  | -3.47015800 |
| F  | 7.29334500  |   | -0.07877600 | -2.68268700 | -7.29824700 | 0.59919800  | -2.71460700 |
| S  | -2.85574200 |   | 5.09897300  | -1.94876500 | 2.54548900  | -5.26612900 | -1.90702500 |
| F  | -1.47692000 |   | 5.93566600  | -2.09361700 | 1.11400300  | -6.00749400 | -2.05027500 |
| F  | -3.16063500 |   | 5.84600200  | -0.54403500 | 2.80170300  | -6.03996600 | -0.50920900 |
| F  | -4.31228800 |   | 4.39369600  | -1.87898500 | 4.04208300  | -4.65467600 | -1.83379000 |
| F  | -2.62960900 |   | 4.48255300  | -3.42874000 | 2.35659700  | -4.61823300 | -3.37783300 |
| F  | -3.59079500 |   | 6.34737500  | -2.67380500 | 3.19408600  | -6.55172600 | -2.64518200 |
| C  | 1.98337100  |   | -0.90205800 | -1.03082200 | -1.94057600 | 1.02972900  | -1.07003700 |
| C  | 3.22031400  |   | -0.90104100 | -1.66286000 | -3.17608200 | 1.11925600  | -1.69973200 |
| C  | 4.23800900  |   | -0.09540500 | -1.15458300 | -4.24883700 | 0.39216400  | -1.18737500 |
| C  | 4.03310200  |   | 0.69939500  | -0.03732200 | -4.10351500 | -0.41054400 | -0.06682500 |
| C  | 2.78194200  |   | 0.68852100  | 0.58483900  | -2.85430800 | -0.48888400 | 0.55514900  |
| C  | 1.71349300  |   | -0.11778200 | 0.10437000  | -1.73201900 | 0.23169800  | 0.06595200  |
| C  | 2.49587000  |   | 1.50928300  | 1.76629200  | -2.63486000 | -1.31030500 | 1.75245900  |
| C  | 3.39345400  |   | 2.38411300  | 2.38528200  | -3.59676600 | -2.10765300 | 2.37881600  |
| C  | 2.99678200  |   | 3.10405300  | 3.50212700  | -3.25939500 | -2.83381600 | 3.51137100  |
| C  | 1.70212500  |   | 2.94328900  | 3.99002900  | -1.96099000 | -2.75717500 | 4.01074900  |
| N  | 1.23969100  |   | 1.36535700  | 2.25515200  | -1.37663000 | -1.25011400 | 2.25383200  |
| C  | -0.95528700 |   | -1.42167900 | 0.10605800  | 1.05957100  | 1.33665300  | 0.09877000  |
| C  | -1.77306100 |   | -1.26232400 | -1.02647200 | 1.87929300  | 1.09797600  | -1.01642600 |
| C  | -2.39554300 |   | -2.33336000 | -1.65473500 | 2.60539700  | 2.10841900  | -1.63378100 |
| C  | -2.20615000 |   | -3.61784300 | -1.14688300 | 2.52133000  | 3.40500600  | -1.12961600 |
| C  | -1.41098000 |   | -3.83873100 | -0.03308000 | 1.72725000  | 3.69912600  | -0.03257100 |
| C  | -0.79144800 |   | -2.75021900 | 0.58660200  | 0.99906400  | 2.67336800  | 0.57584600  |
| C  | 0.06600900  |   | -2.91304600 | 1.76566400  | 0.12993800  | 2.91817500  | 1.73216600  |
| C  | 0.37516900  |   | -4.12699700 | 2.38573000  | -0.09007600 | 4.15950400  | 2.33512900  |
| C  | 1.20196700  |   | -4.14296800 | 3.49899900  | -0.94868400 | 4.25584200  | 3.42000900  |
| C  | 1.71500900  |   | -2.94150100 | 3.98199900  | -1.58229900 | 3.10841300  | 3.89111400  |



|   |             |             |             |             |             |             |
|---|-------------|-------------|-------------|-------------|-------------|-------------|
| C | 1.37443400  | -1.77053600 | 3.32379900  | -1.32434500 | 1.90669300  | 3.25115100  |
| N | 0.57284800  | -1.75281200 | 2.25057400  | -0.49089300 | 1.81220700  | 2.20748300  |
| C | -0.21397500 | 2.16297600  | -1.03074200 | 0.04305900  | -2.18018900 | -1.02172700 |
| C | -0.75262600 | 1.54058100  | 0.10924600  | 0.60299900  | -1.57294600 | 0.10393500  |
| C | -2.62000100 | 3.14230300  | -0.02594300 | 2.42458500  | -3.31200800 | 0.00210200  |
| C | -2.03949200 | 3.71431600  | -1.14709300 | 1.80459800  | -3.82843900 | -1.09655800 |
| C | -0.83565800 | 3.23343200  | -1.66094300 | 0.60579300  | -3.29346600 | -1.64311000 |
| C | -1.98256200 | 2.06487500  | 0.59434900  | 1.84505100  | -2.16670500 | 0.65460800  |
| C | -2.54643400 | 1.40622300  | 1.77712300  | 2.38526000  | -1.58465300 | 1.80091200  |
| C | -3.74787000 | 1.74766300  | 2.40466100  | 3.56777500  | -2.01054500 | 2.49435200  |
| C | -4.16936700 | 1.03995600  | 3.52028800  | 4.01336900  | -1.32615800 | 3.58972600  |
| C | -3.38468200 | -0.00686900 | 3.99825100  | 3.29281400  | -0.18649300 | 4.03583200  |
| C | -2.20469200 | -0.29957500 | 3.33258900  | 2.14049200  | 0.18532500  | 3.34600400  |
| N | -1.79475200 | 0.38561300  | 2.25721900  | 1.67666100  | -0.46979000 | 2.28865000  |
| H | 1.74747200  | -0.80701400 | 3.65433900  | -1.78837200 | 0.98163000  | 3.57581100  |
| H | 2.36665800  | -2.90628700 | 4.84795000  | -2.26248800 | 3.13773500  | 4.73493800  |
| H | 1.44489500  | -5.08352700 | 3.98385100  | -1.12327700 | 5.21766700  | 3.89225800  |
| H | -0.02689100 | -5.05635700 | 1.99878700  | 0.40501800  | 5.04657800  | 1.95745200  |
| H | -1.27840200 | -4.84597700 | 0.34373300  | 1.67760000  | 4.71491700  | 0.34099800  |
| H | -3.01832300 | -2.16779400 | -2.52683700 | 3.22607500  | 1.88514200  | -2.49425900 |
| H | -1.92867300 | -0.26851900 | -1.43625700 | 1.94339700  | 0.09333700  | -1.42390700 |
| H | 1.34826800  | 3.48647600  | 4.85919400  | -1.65558700 | -3.30929100 | 4.89246100  |
| H | 3.69050500  | 3.78478700  | 3.98598700  | -4.00347900 | -3.45529200 | 4.00003000  |
| H | 4.39779800  | 2.50343200  | 1.99536700  | -4.60416600 | -2.16303800 | 1.98273000  |
| H | 4.84005200  | 1.31586100  | 0.34046000  | -4.95352800 | -0.96363600 | 0.31438900  |
| H | 3.38683400  | -1.52001000 | -2.53752300 | -3.29818300 | 1.74513400  | -2.57654800 |
| H | 1.20088500  | -1.53402900 | -1.44074300 | -1.11297700 | 1.59878600  | -1.48378700 |
| C | 0.85727500  | 2.06329400  | 3.33217400  | -1.05038700 | -1.95138000 | 3.34695600  |
| H | -0.16174500 | 1.90142500  | 3.66668300  | -0.02409000 | -1.85114400 | 3.68400100  |
| H | -1.55538500 | -1.10487900 | 3.65909100  | 1.56051100  | 1.04727800  | 3.66372800  |
| H | -3.67617500 | -0.58842300 | 4.86574300  | 3.61505000  | 0.39039700  | 4.89484400  |
| H | -5.10198300 | 1.30153700  | 4.01077300  | 4.90768800  | -1.64811500 | 4.11416100  |
| H | -4.35196500 | 2.56236900  | 2.02194700  | 4.10481300  | -2.88398500 | 2.14100700  |
| H | -3.55628500 | 3.53262800  | 0.35517500  | 3.33965900  | -3.75294300 | 0.37655700  |
| H | -0.38794400 | 3.68372500  | -2.53991600 | 0.14858800  | -3.73516100 | -2.51880400 |
| H | 0.72089600  | 1.79761600  | -1.44619100 | -0.86652300 | -1.76452200 | -1.44525600 |

**Table S9** The xyz coordinates for the optimized structures for **2** in the  $S_0$  and  $T_1$  states at PBE0/6–31G(d,p) level

|    | $S_0$       |             |             | $T_1$       |             |             |
|----|-------------|-------------|-------------|-------------|-------------|-------------|
| Ir | 0.00000000  | 0.88437800  | 0.00000000  | 0.02223400  | 0.87721400  | -0.05443300 |
| S  | 4.89584500  | -3.50140200 | -0.31668800 | -5.14110100 | -3.13298500 | 0.38371300  |
| F  | 4.48759800  | -4.14835700 | 1.11056900  | -4.70503700 | -3.94668900 | -0.94572700 |
| F  | 4.01734000  | -4.62822100 | -1.07777300 | -4.35211000 | -4.21109900 | 1.29708600  |
| F  | 5.43166900  | -2.96369900 | -1.74649200 | -5.70818600 | -2.41712500 | 1.71980500  |
| F  | 5.90092200  | -2.48323700 | 0.44224900  | -6.05742000 | -2.15544200 | -0.52383900 |
| F  | 6.12419600  | -4.55672400 | -0.34775300 | -6.42136400 | -4.11983600 | 0.46851500  |
| O  | 1.42900700  | 2.44744600  | -0.39881800 | -1.24655300 | 2.59430600  | 0.22249500  |
| N  | 0.74580300  | 0.83627900  | 1.90214500  | -0.65601900 | 0.81729200  | -1.95943500 |
| C  | 1.81922100  | 0.02512800  | 2.09587700  | -1.78139400 | -0.00338700 | -2.15027800 |
| C  | 2.43103700  | -0.03554200 | 3.34848600  | -2.32743800 | -0.12038800 | -3.46129300 |
| H  | 3.28922100  | -0.68005700 | 3.50182800  | -3.19078700 | -0.75933300 | -3.61729600 |
| C  | 1.93734600  | 0.72885600  | 4.39555600  | -1.77243800 | 0.56090300  | -4.50932900 |
| H  | 2.40970200  | 0.68532600  | 5.37200500  | -2.18988600 | 0.47049400  | -5.50736100 |
| C  | 0.82985700  | 1.54573000  | 4.17852900  | -0.63875600 | 1.38985100  | -4.27864700 |
| H  | 0.40825200  | 2.15541900  | 4.96971400  | -0.16996500 | 1.94623600  | -5.08199700 |
| C  | 0.26319300  | 1.57073100  | 2.91483800  | -0.12741800 | 1.47653600  | -2.99609600 |
| H  | -0.60105000 | 2.18095700  | 2.67827900  | 0.74275200  | 2.08360000  | -2.76721800 |
| C  | 2.20209300  | -0.73469500 | 0.90576100  | -2.23783600 | -0.62437400 | -0.97918300 |
| C  | 1.40167500  | -0.49840000 | -0.24273100 | -1.48336700 | -0.33750200 | 0.24483800  |
| C  | 1.71263200  | -1.23142300 | -1.39815000 | -1.89925600 | -0.92382700 | 1.44201500  |
| H  | 1.12532700  | -1.09379200 | -2.30173300 | -1.34628200 | -0.72576600 | 2.35629500  |
| C  | 2.76495600  | -2.13844100 | -1.43162900 | -3.00485000 | -1.76726800 | 1.51025500  |
| H  | 2.98158400  | -2.68738800 | -2.34122300 | -3.31477900 | -2.21003000 | 2.44749200  |
| C  | 3.53317400  | -2.33101700 | -0.28347400 | -3.70767200 | -2.03138100 | 0.30738600  |
| C  | 3.26386000  | -1.64025300 | 0.88897100  | -3.36275500 | -1.50168200 | -0.90716300 |
| H  | 3.87008900  | -1.80783800 | 1.77166100  | -3.93359200 | -1.73810100 | -1.79674900 |
| C  | 2.26182600  | 6.05318500  | -0.45618600 | -1.68550700 | 6.25071300  | 0.57748100  |
| H  | 3.20904600  | 6.57076200  | -0.64649800 | -2.57823000 | 6.85606600  | 0.77132700  |
| H  | 1.91995600  | 6.34661000  | 0.54273900  | -1.24955600 | 6.59791200  | -0.36589900 |
| H  | 1.53496600  | 6.41457800  | -1.19244000 | -0.97113600 | 6.44839800  | 1.38466600  |
| C  | 2.48419900  | 4.54419700  | -0.56362700 | -2.08356700 | 4.77604100  | 0.51484900  |
| C  | 1.22459100  | 3.69981500  | -0.30017500 | -0.90724500 | 3.82203000  | 0.25047700  |
| C  | -0.00000100 | 4.32041300  | 0.00000100  | 0.39277400  | 4.31814200  | 0.06355000  |
| H  | -0.00000100 | 5.39880200  | 0.00000200  | 0.52050100  | 5.38530600  | 0.15170500  |
| C  | 3.54574000  | 4.12172500  | 0.46463200  | -3.10020200 | 4.57806900  | -0.62120100 |
| H  | 3.21854800  | 4.35213200  | 1.48573500  | -2.66932300 | 4.86203900  | -1.58867200 |
| H  | 4.48127800  | 4.66221500  | 0.27916000  | -3.98114200 | 5.20603100  | -0.44522700 |
| H  | 3.74447200  | 3.04822700  | 0.40059700  | -3.42225300 | 3.53458000  | -0.67984100 |
| C  | 2.98562200  | 4.21231100  | -1.97761900 | -2.72698300 | 4.37328800  | 1.85088800  |

|   |             |             |             |             |             |             |
|---|-------------|-------------|-------------|-------------|-------------|-------------|
| H | 3.17920900  | 3.14073800  | -2.08156800 | -3.03418200 | 3.32360600  | 1.83686000  |
| H | 3.91643700  | 4.75414100  | -2.18197500 | -3.61196900 | 4.99160800  | 2.03987700  |
| H | 2.25043700  | 4.50846500  | -2.73610100 | -2.03042500 | 4.52157900  | 2.68546600  |
| S | -4.89584400 | -3.50140300 | 0.31668900  | 4.61105600  | -3.82252300 | -0.23413600 |
| F | -4.48759700 | -4.14835800 | -1.11056800 | 4.14011800  | -4.41820700 | 1.19413600  |
| F | -4.01733900 | -4.62822200 | 1.07777400  | 3.66633100  | -4.89421300 | -0.99158400 |
| F | -5.43166800 | -2.96370000 | 1.74649300  | 5.19278500  | -3.33406000 | -1.66162400 |
| F | -5.90092100 | -2.48323800 | -0.44224800 | 5.66547100  | -2.85784600 | 0.52421600  |
| F | -6.12419500 | -4.55672500 | 0.34775400  | 5.76645500  | -4.95354800 | -0.23723000 |
| O | -1.42900800 | 2.44744600  | 0.39881700  | 1.56009800  | 2.31675600  | -0.48682100 |
| N | -0.74580300 | 0.83627900  | -1.90214600 | 0.76628200  | 0.85000200  | 1.87024400  |
| C | -1.81922100 | 0.02512700  | -2.09587700 | 1.76978000  | -0.03867700 | 2.08781600  |
| C | -2.43103700 | -0.03554300 | -3.34848600 | 2.38178100  | -0.10928900 | 3.33841300  |
| H | -3.28922100 | -0.68005900 | -3.50182800 | 3.18148600  | -0.81949400 | 3.51392300  |
| C | -1.93734600 | 0.72885400  | -4.39555600 | 1.96135100  | 0.73293500  | 4.35848800  |
| H | -2.40970200 | 0.68532400  | -5.37200600 | 2.43298400  | 0.68234700  | 5.33478700  |
| C | -0.82985800 | 1.54572900  | -4.17853000 | 0.93006100  | 1.63583800  | 4.11514200  |
| H | -0.40825300 | 2.15541700  | -4.96971500 | 0.56801300  | 2.30806300  | 4.88466600  |
| C | -0.26319300 | 1.57073000  | -2.91483900 | 0.35736500  | 1.66244300  | 2.85322700  |
| H | 0.60104900  | 2.18095700  | -2.67828000 | -0.45568800 | 2.33417800  | 2.60333100  |
| C | -2.20209300 | -0.73469600 | -0.90576100 | 2.09769200  | -0.85872900 | 0.91896900  |
| C | -1.40167400 | -0.49840100 | 0.24273100  | 1.32996600  | -0.60320200 | -0.24467900 |
| C | -1.71263200 | -1.23142300 | 1.39815000  | 1.59753800  | -1.36388300 | -1.38937300 |
| H | -1.12532600 | -1.09379300 | 2.30173300  | 1.02969300  | -1.19299600 | -2.29865200 |
| C | -2.76495500 | -2.13844200 | 1.43162900  | 2.58651300  | -2.34045700 | -1.39511200 |
| H | -2.98158300 | -2.68738900 | 2.34122300  | 2.77773700  | -2.91724800 | -2.29259900 |
| C | -3.53317300 | -2.33101800 | 0.28347400  | 3.32336200  | -2.56247200 | -0.23291200 |
| C | -3.26385900 | -1.64025400 | -0.88897100 | 3.09319100  | -1.83647400 | 0.92704900  |
| H | -3.87008800 | -1.80783900 | -1.77166000 | 3.68119900  | -2.03053600 | 1.81615000  |
| C | -2.26182800 | 6.05318400  | 0.45618900  | 2.85029200  | 5.78046200  | -0.32291800 |
| H | -3.20904800 | 6.57076100  | 0.64650200  | 3.85252000  | 6.18696000  | -0.49969200 |
| H | -1.91995700 | 6.34661100  | -0.54273500 | 2.55918800  | 6.05089500  | 0.69827300  |
| H | -1.53496800 | 6.41457600  | 1.19244400  | 2.16591700  | 6.27356700  | -1.02239800 |
| C | -2.48420000 | 4.54419500  | 0.56362700  | 2.88184300  | 4.26556200  | -0.52661700 |
| C | -1.22459300 | 3.69981400  | 0.30017500  | 1.52880900  | 3.57569800  | -0.29546000 |
| C | -3.54574200 | 4.12172500  | -0.46463200 | 3.88787900  | 3.64782800  | 0.45819200  |
| H | -3.21854800 | 4.35213400  | -1.48573500 | 3.60083200  | 3.85436800  | 1.49632000  |
| H | -4.48127900 | 4.66221500  | -0.27916000 | 4.88307200  | 4.07532600  | 0.29045800  |
| H | -3.74447400 | 3.04822700  | -0.40059900 | 3.94802200  | 2.56386100  | 0.32593000  |
| C | -2.98562400 | 4.21230800  | 1.97761900  | 3.32462800  | 3.96263500  | -1.96659200 |
| H | -3.17921000 | 3.14073400  | 2.08156600  | 3.38587200  | 2.88435900  | -2.13922000 |
| H | -3.91643900 | 4.75413600  | 2.18197600  | 4.31228100  | 4.40034400  | -2.15186600 |
| H | -2.25044000 | 4.50846100  | 2.73610200  | 2.62339100  | 4.39152900  | -2.69271200 |

**Table S10** The xyz coordinates for the optimized structures for **3** in the  $S_0$  and  $T_1$  states at PBE0/6–31G(d,p) level

|    | $S_0$       |             |             | $T_1$       |             |             |
|----|-------------|-------------|-------------|-------------|-------------|-------------|
| Ir | -0.34202500 | -0.83059100 | 0.04368300  | -0.35629500 | -0.82677300 | 0.00109200  |
| S  | -2.35671300 | 5.41354100  | 0.39515000  | -2.07414000 | 5.50398300  | 0.31961200  |
| F  | -1.64469000 | 5.80190000  | 1.00619400  | -1.32798700 | 5.83211500  | 1.07772800  |
| F  | -1.04661500 | 5.91898900  | -1.19999300 | -0.74984000 | 5.95402600  | -1.13115200 |
| F  | -3.12257500 | 5.17984200  | -1.80169800 | -2.86363900 | 5.32266200  | -1.71913900 |
| F  | -3.72055100 | 5.06484600  | 0.40513200  | -3.44206600 | 5.20311800  | 0.49041500  |
| F  | -2.88278500 | 6.94353100  | -0.45655800 | -2.52775400 | 7.05534700  | -0.35251600 |
| O  | -2.38098500 | -1.48730900 | -0.31567700 | -2.41966500 | -1.38086400 | -0.38837400 |
| N  | -0.94752900 | -0.37482200 | 1.94244500  | -0.96522300 | -0.39146500 | 1.91995500  |
| C  | -1.45852600 | 0.87250900  | 2.11451700  | -1.40260300 | 0.87926500  | 2.11335800  |
| C  | -1.94168700 | 1.26220200  | 3.36381000  | -1.87869100 | 1.27112700  | 3.36366600  |
| H  | -2.35149400 | 2.25653800  | 3.50049500  | -2.22713600 | 2.28556300  | 3.51978800  |
| C  | -1.89316300 | 0.37489900  | 4.42923300  | -1.90327800 | 0.35624000  | 4.40727500  |
| H  | -2.26773600 | 0.67283900  | 5.40356000  | -2.27214200 | 0.65469200  | 5.38349800  |
| C  | -1.35573400 | -0.89550200 | 4.23408700  | -1.44856000 | -0.94150500 | 4.18810700  |
| H  | -1.29330100 | -1.61762900 | 5.04028900  | -1.44657400 | -1.68532600 | 4.97664600  |
| C  | -0.89318200 | -1.23163500 | 2.97256400  | -0.98581000 | -1.27621600 | 2.92560900  |
| H  | -0.45885300 | -2.20018900 | 2.75225300  | -0.60796000 | -2.26445200 | 2.69001100  |
| C  | -1.41563000 | 1.69458200  | 0.90509200  | -1.30950400 | 1.72231900  | 0.91940300  |
| C  | -0.85795200 | 1.06183300  | -0.23604300 | -0.78722300 | 1.09235200  | -0.23795400 |
| C  | -0.77020900 | 1.82047800  | -1.41167500 | -0.67289500 | 1.85358300  | -1.40691900 |
| H  | -0.34506400 | 1.38292500  | -2.31029500 | -0.27935800 | 1.40287200  | -2.31260800 |
| C  | -1.22167300 | 3.13384300  | -1.47042800 | -1.05992400 | 3.18842500  | -1.44127200 |
| H  | -1.14356900 | 3.69467400  | -2.39496000 | -0.96414600 | 3.75924900  | -2.35764100 |
| C  | -1.77191500 | 3.71524900  | -0.32883900 | -1.56905100 | 3.77522900  | -0.28424600 |
| C  | -1.87396700 | 3.01185800  | 0.86216800  | -1.69926600 | 3.06158400  | 0.89828700  |
| H  | -2.30126000 | 3.48334700  | 1.73945300  | -2.09782700 | 3.54184200  | 1.78388300  |
| C  | -5.17531000 | -3.23175600 | 0.69627400  | -5.33950300 | -2.83454000 | 0.71013700  |
| H  | -6.25348400 | -3.20385000 | 0.49851600  | -6.41377300 | -2.72697100 | 0.51911100  |
| H  | -4.98249800 | -2.62265000 | 1.58749900  | -5.08751300 | -2.20465000 | 1.57162700  |
| H  | -4.88555600 | -4.26321500 | 0.90604300  | -5.13151800 | -3.87609100 | 0.96301200  |
| C  | -4.42629400 | -2.67209500 | -0.52474500 | -4.56201500 | -2.39196800 | -0.54137400 |
| C  | -2.91793000 | -2.62443000 | -0.23845800 | -3.05462900 | -2.46314800 | -0.26577100 |
| C  | -2.17701700 | -3.80606600 | 0.08474100  | -2.40858300 | -3.68715700 | 0.09187200  |
| C  | -4.93772300 | -1.25613800 | -0.80422200 | -4.95335900 | -0.95048400 | -0.87813400 |
| H  | -4.77738900 | -0.59237900 | 0.05111200  | -4.72423700 | -0.26626000 | -0.05507200 |
| H  | -6.01359900 | -1.30217200 | -1.00693100 | -6.03181500 | -0.91167600 | -1.06743500 |
| H  | -4.44346300 | -0.81088100 | -1.67309800 | -4.43498400 | -0.58854900 | -1.77139400 |
| C  | -4.69678100 | -3.54426100 | -1.76275300 | -4.91794000 | -3.29215700 | -1.73682100 |
| H  | -4.17680200 | -3.14850100 | -2.64357200 | -4.37183400 | -2.98455300 | -2.63658500 |

|   |             |             |             |             |             |             |
|---|-------------|-------------|-------------|-------------|-------------|-------------|
| H | -5.77189100 | -3.53513700 | -1.97835700 | -5.98975600 | -3.19817100 | -1.94759300 |
| H | -4.38073900 | -4.57679800 | -1.60198200 | -4.69308100 | -4.34022900 | -1.52956600 |
| S | 6.08080400  | 0.54723500  | 0.32351600  | 6.09393900  | 0.25817900  | 0.36307600  |
| F | 6.04616100  | 1.30078100  | -1.10932100 | 6.08249400  | 1.15433200  | -0.98381000 |
| F | 5.87957200  | 1.96677100  | 1.07464100  | 5.90865300  | 1.59741800  | 1.25167600  |
| F | 6.27737200  | -0.17622700 | 1.75801100  | 6.26151600  | -0.61449000 | 1.71508800  |
| F | 6.44369200  | -0.84159100 | -0.42571500 | 6.43420800  | -1.05315100 | -0.52082800 |
| F | 7.67062400  | 0.85159900  | 0.35150000  | 7.68726800  | 0.52749400  | 0.43399000  |
| O | 0.08239400  | -2.91800000 | 0.50027000  | -0.07494200 | -2.96220800 | 0.37641400  |
| N | 0.32205500  | -1.19946900 | -1.85811900 | 0.25597700  | -1.16246400 | -1.89982900 |
| C | 1.65478900  | -1.02362400 | -2.06048100 | 1.63789700  | -0.98029400 | -2.10414800 |
| C | 2.21300800  | -1.29262000 | -3.31041200 | 2.17135600  | -1.17779600 | -3.41319600 |
| H | 3.27634200  | -1.15449400 | -3.47003700 | 3.23349000  | -1.02835500 | -3.57701900 |
| C | 1.40399800  | -1.73475600 | -4.34696200 | 1.35666600  | -1.54770100 | -4.44650500 |
| H | 1.83337800  | -1.94533100 | -5.32143500 | 1.76222000  | -1.69752600 | -5.44203400 |
| C | 0.03925500  | -1.89981900 | -4.12197400 | -0.03273400 | -1.73141000 | -4.20333600 |
| H | -0.63056900 | -2.23818900 | -4.90434200 | -0.71312100 | -2.02329800 | -4.99473000 |
| C | -0.46182700 | -1.62089400 | -2.86135600 | -0.52180000 | -1.52387200 | -2.92377900 |
| H | -1.51448600 | -1.72470500 | -2.62488200 | -1.57674200 | -1.63753200 | -2.69665800 |
| C | 2.36651800  | -0.53141000 | -0.88131900 | 2.33855600  | -0.61536100 | -0.95140600 |
| C | 1.55900700  | -0.32193900 | 0.26609800  | 1.54258600  | -0.46747100 | 0.27635900  |
| C | 2.19143000  | 0.17624300  | 1.41434700  | 2.19545200  | -0.11108100 | 1.45815300  |
| H | 1.61433000  | 0.36012100  | 2.31609300  | 1.62257400  | 0.00842700  | 2.37351700  |
| C | 3.55553800  | 0.44057300  | 1.44136700  | 3.56901800  | 0.10078000  | 1.50896500  |
| H | 4.01797200  | 0.82108000  | 2.34508400  | 4.05947400  | 0.36928300  | 2.43507000  |
| C | 4.31555100  | 0.21044000  | 0.29516500  | 4.30970400  | -0.03785200 | 0.30326200  |
| C | 3.73759200  | -0.27134500 | -0.86998500 | 3.74903600  | -0.37584900 | -0.89552500 |
| H | 4.34587000  | -0.43885700 | -1.75115200 | 4.35693100  | -0.46535500 | -1.78723900 |
| C | -0.78847600 | -3.82428600 | 0.40118300  | -1.01345100 | -3.80458100 | 0.34858300  |
| S | -0.31973400 | -5.50756600 | 0.72346600  | -0.66024100 | -5.50673700 | 0.70461400  |
| C | -1.97009400 | -5.99532900 | 0.41535600  | -2.35628000 | -5.87276900 | 0.48568500  |
| H | -2.25091200 | -7.04083600 | 0.48564600  | -2.71236200 | -6.89045400 | 0.60545600  |
| N | -2.78619200 | -5.05197600 | 0.11103400  | -3.11145400 | -4.87881300 | 0.18462000  |

**Table S11** The xyz coordinates for the optimized structures for **4** in the  $S_0$  and  $T_1$  states at PBE0/6–31G(d,p) level

|    | $S_0$       |             |             | $T_1$       |             |              |
|----|-------------|-------------|-------------|-------------|-------------|--------------|
| Ir | -0.52870100 | -0.02455700 | -0.18643600 | 0.54178700  | -0.01216300 | 0.16272900   |
| S  | 4.28929900  | -4.40201100 | 0.77832500  | -4.25730400 | -4.42707300 | -0.71178200  |
| F  | 5.03378800  | -3.95416100 | -0.58811500 | -4.98242000 | -3.98197100 | 0.66524200   |
| F  | 5.21903300  | -3.37912300 | 1.62013100  | -5.20759500 | -3.41291300 | -1.53994200  |
| F  | 3.66382000  | -4.96245300 | 2.16197200  | -3.64755500 | -4.98288300 | -2.10356200  |
| F  | 3.47942600  | -5.53623200 | -0.04602100 | -3.42267300 | -5.55052200 | 0.10136800   |
| F  | 5.46838000  | -5.49585200 | 0.96365000  | -5.42855500 | -5.53123800 | -0.87614000  |
| O  | -2.07118400 | -1.54200700 | 0.00545500  | 2.08603600  | -1.51947100 | -0.04880800  |
| N  | -0.21341700 | -0.83148700 | -2.03841800 | 0.25429000  | -0.80735000 | 2.02895000   |
| C  | 0.73003100  | -1.80711600 | -2.10484900 | -0.67959800 | -1.79065000 | 2.11141600   |
| C  | 0.98763500  | -2.44343400 | -3.31941500 | -0.91873500 | -2.42246900 | 3.33175700   |
| H  | 1.73961100  | -3.22233300 | -3.37592600 | -1.66293500 | -3.20764200 | 3.39979300   |
| C  | 0.27929900  | -2.07517000 | -4.45439900 | -0.20328100 | -2.04115900 | 4.45753300   |
| H  | 0.47654300  | -2.56681900 | -5.40191700 | -0.38584900 | -2.52969800 | 5.40944900   |
| C  | -0.68228200 | -1.07119800 | -4.36333200 | 0.74543100  | -1.02662100 | 4.35196500   |
| H  | -1.25661000 | -0.75310600 | -5.22607300 | 1.32378700  | -0.69578200 | 5.20699200   |
| C  | -0.90017900 | -0.47350700 | -3.13291100 | 0.94531800  | -0.43427300 | 3.11653200   |
| H  | -1.63294600 | 0.31231900  | -2.98544200 | 1.66610100  | 0.36173200  | 2.96829000   |
| C  | 1.39437600  | -2.06808000 | -0.82712800 | -1.35918800 | -2.06289600 | 0.84490700 - |
| C  | 0.94884100  | -1.27263800 | 0.26122000  | -0.93926600 | -1.26918900 | 0.25232500   |
| C  | 1.57406600  | -1.47509700 | 1.50006900  | -1.57864200 | -1.47717900 | -1.48121900  |
| H  | 1.27375700  | -0.88608500 | 2.36209100  | -1.29698000 | -0.88866200 | -2.34925200  |
| C  | 2.58039800  | -2.41918700 | 1.66792800  | -2.57939600 | -2.43067800 | -1.63098000  |
| H  | 3.04508900  | -2.55228200 | 2.63837900  | -3.05706900 | -2.56948000 | -2.59416100  |
| C  | 2.98231200  | -3.18534800 | 0.57452200  | -2.95750400 | -3.19746100 | -0.53045400  |
| C  | 2.40104600  | -3.02223100 | -0.67423700 | -2.35929000 | -3.02646400 | 0.70882500   |
| H  | 2.73084500  | -3.62675900 | -1.51096400 | -2.67077700 | -3.63171900 | 1.55183000   |
| C  | -5.06411600 | -2.95571900 | -1.23370700 | 5.06308900  | -2.96615700 | 1.17435900   |
| H  | -5.42229600 | -3.98797300 | -1.31379700 | 5.43556000  | -3.99524600 | 1.22234100   |
| H  | -4.63664700 | -2.67493800 | -2.20300100 | 4.61916200  | -2.72642300 | 2.14735000   |
| H  | -5.93304600 | -2.31985600 | -1.05457900 | 5.91977600  | -2.30761300 | 1.02348700   |
| C  | -3.99614300 | -2.88880300 | -0.12888500 | 4.00651500  | -2.87847800 | 0.05961200   |
| C  | -3.31447600 | -1.50407600 | -0.06600800 | 3.33228800  | -1.49560900 | 0.01469900   |
| C  | -2.92468900 | -3.93719600 | -0.46380200 | 2.93214600  | -3.93369400 | 0.35808000   |
| H  | -2.44199900 | -3.72456100 | -1.42334100 | 2.44034200  | -3.74489300 | 1.31798300   |
| H  | -3.40382200 | -4.91963100 | -0.53107200 | 3.41063300  | -4.91756900 | 0.40562600   |
| H  | -2.14829900 | -3.98372200 | 0.30373800  | 2.16320100  | -3.96128100 | -0.41804500  |
| C  | -4.57806800 | -3.26246900 | 1.24988700  | 4.60669100  | -3.21530500 | -1.32111800  |
| H  | -3.80321200 | -3.21168800 | 2.02289400  | 3.83323700  | -3.17881100 | -2.09637800  |
| H  | -4.94060600 | -4.29551200 | 1.20667600  | 5.00140800  | -4.23689800 | -1.28917900  |

|   |             |             |             |             |             |             |
|---|-------------|-------------|-------------|-------------|-------------|-------------|
| H | -5.41447500 | -2.63641600 | 1.56970500  | 5.42152900  | -2.55526600 | -1.62618800 |
| S | 3.48965200  | 5.17223600  | -0.30953300 | -3.54790200 | 5.13107200  | 0.32211400  |
| F | 4.04319400  | 4.85548100  | 1.17865700  | -4.14800400 | 4.76898400  | -1.13668600 |
| F | 4.73599400  | 4.35943800  | -0.94635700 | -4.75457400 | 4.31120700  | 1.02183900  |
| F | 3.03222900  | 5.62137000  | -1.79569600 | -3.04418100 | 5.62065700  | 1.77960900  |
| F | 2.34149100  | 6.11853200  | 0.32907600  | -2.43898800 | 6.07919200  | -0.37887000 |
| F | 4.45117600  | 6.47453400  | -0.30020200 | -4.53085200 | 6.41615800  | 0.31820700  |
| O | -2.19436900 | 1.17174800  | -0.83654400 | 2.20445600  | 1.19700600  | 0.70440100  |
| N | -0.74075400 | 0.79943300  | 1.67611000  | 0.68475700  | 0.78377300  | -1.72096000 |
| C | -0.02626300 | 1.93405800  | 1.90069600  | -0.06170200 | 1.89780000  | -1.94356100 |
| C | -0.13269500 | 2.59746300  | 3.12342400  | -0.00948100 | 2.53550400  | -3.18269400 |
| H | 0.43600300  | 3.50348300  | 3.29909900  | -0.60352700 | 3.42467100  | -3.35979500 |
| C | -0.96420100 | 2.09311400  | 4.11236800  | 0.80278900  | 2.02761000  | -4.18620600 |
| H | -1.05072000 | 2.60523500  | 5.06551800  | 0.84689900  | 2.52021700  | -5.15237800 |
| C | -1.67925700 | 0.92287000  | 3.86782500  | 1.55438000  | 0.88101000  | -3.94023200 |
| H | -2.33593800 | 0.48965400  | 4.61365500  | 2.19860900  | 0.44812500  | -4.69684500 |
| C | -1.53927300 | 0.30741300  | 2.63534400  | 1.46699300  | 0.28844600  | -2.69188700 |
| H | -2.06728500 | -0.60675900 | 2.39066300  | 2.02369600  | -0.60781700 | -2.44456700 |
| C | 0.82173800  | 2.32345700  | 0.77533000  | -0.87604000 | 2.29818500  | -0.79686500 |
| C | 0.76190000  | 1.46296700  | -0.35093600 | -0.76011200 | 1.46965800  | 0.34700800  |
| C | 1.57592400  | 1.78116400  | -1.44756400 | -1.53194800 | 1.80095300  | 1.46773300  |
| H | 1.56930500  | 1.14982200  | -2.33099900 | -1.48052800 | 1.19289600  | 2.36568400  |
| C | 2.40002000  | 2.90001700  | -1.44518900 | -2.37388500 | 2.90722800  | 1.46988700  |
| H | 3.01610200  | 3.12271900  | -2.30900800 | -2.95843700 | 3.14218400  | 2.35206900  |
| C | 2.42361100  | 3.72527700  | -0.32147400 | -2.45630500 | 3.70172000  | 0.32781700  |
| C | 1.64489000  | 3.45021500  | 0.79267900  | -1.71770300 | 3.41127500  | -0.80939900 |
| H | 1.68104600  | 4.10277900  | 1.65722300  | -1.79829800 | 4.04074000  | -1.68782400 |
| C | -4.04969800 | -0.23657200 | -0.11080200 | 4.08153500  | -0.23001000 | 0.05603700  |
| C | -3.42537000 | 1.00687200  | -0.52733400 | 3.44686200  | 1.00218900  | 0.46356600  |
| C | -5.41099200 | -0.20900500 | 0.22565400  | 5.44727700  | -0.18731700 | -0.24235200 |
| C | -4.26962500 | 2.16038300  | -0.64736400 | 4.27502000  | 2.18165700  | 0.64651000  |
| C | -6.16159400 | 0.94684100  | 0.14982800  | 6.21241200  | 1.01691100  | -0.11635200 |
| C | -5.59277800 | 2.14892600  | -0.31108200 | 5.60792200  | 2.20084900  | 0.35216400  |
| H | -6.20395600 | 3.04135900  | -0.38293700 | 6.21401100  | 3.09110200  | 0.46690800  |
| H | -5.91281500 | -1.09483800 | 0.58371600  | 5.99152200  | -1.04972800 | -0.58685100 |
| H | -3.79118200 | 3.07068900  | -0.99483700 | 3.76258900  | 3.06918800  | 1.00421800  |
| N | -7.54411400 | 0.91139500  | 0.53356400  | 7.56560400  | 1.01179000  | -0.42876400 |
| O | -8.19481000 | 1.94853900  | 0.43893400  | 8.22628000  | 2.09334400  | -0.33559200 |
| O | -8.01723500 | -0.14850400 | 0.93649100  | 8.07528900  | -0.09258300 | -0.80234600 |

**Table S12** The xyz coordinates for the optimized structures for **5** in the  $S_0$  and  $T_1$  states at PBE0/6–31G(d,p) level

|    | $S_0$       |             |             | $T_1$       |             |             |
|----|-------------|-------------|-------------|-------------|-------------|-------------|
| Ir | -0.10505800 | -0.05345900 | -0.00182800 | -0.10451700 | -0.07549300 | 0.00077200  |
| S  | -4.08497800 | 5.14710300  | 0.56097000  | -4.13228600 | 5.08169600  | 0.54297500  |
| F  | -4.82234600 | 4.81198400  | -0.84118200 | -4.87080300 | 4.71840000  | 0.84980500  |
| F  | -5.24259800 | 4.34599000  | 1.35990600  | -5.26843800 | 4.26761000  | 1.35620300  |
| F  | -3.44597400 | 5.61740600  | 1.97189000  | -3.48688800 | 5.56972200  | 1.94313300  |
| F  | -3.02582900 | 6.08288800  | -0.22986500 | -3.08931400 | 6.01990400  | -0.26340800 |
| F  | -5.03955200 | 6.45199400  | 0.65389000  | -5.10318900 | 6.37165600  | 0.63031100  |
| O  | 1.57883600  | 1.28353600  | 0.59704900  | 1.55722100  | 1.27057600  | 0.57894000  |
| N  | -0.14731700 | 0.73727000  | -1.88638300 | -0.13364100 | 0.71875000  | -1.89942100 |
| C  | -0.90573200 | 1.85386600  | -2.04023600 | -0.91180000 | 1.81988700  | -2.05456600 |
| C  | -0.99416000 | 2.47267900  | -3.28709000 | -1.00162800 | 2.44300700  | -3.29806900 |
| H  | -1.60032100 | 3.36330100  | -3.40906200 | -1.62590900 | 3.32022700  | -3.42400100 |
| C  | -0.30743800 | 1.94216600  | -4.36989400 | -0.28928600 | 1.93229300  | -4.37466900 |
| H  | -0.37260100 | 2.41892900  | -5.34304700 | -0.35490500 | 2.41131500  | -5.34654000 |
| C  | 0.45795600  | 0.79200900  | -4.19252700 | 0.50236900  | 0.80140800  | -4.19376100 |
| H  | 1.00671900  | 0.34196800  | -5.01225500 | 1.07112100  | 0.36891600  | -5.00907900 |
| C  | 0.51304800  | 0.21940200  | -2.93219000 | 0.55431300  | 0.22205600  | -2.93559100 |
| H  | 1.08478700  | -0.67594600 | -2.71487600 | 1.14195200  | -0.66270600 | -2.71752300 |
| C  | -1.58591800 | 2.27141600  | -0.81430500 | -1.60133600 | 2.22995300  | -0.82953400 |
| C  | -1.36088800 | 1.44052200  | 0.31482500  | -1.37065000 | 1.41552600  | 0.30731700  |
| C  | -2.01827800 | 1.78609100  | 1.50482000  | -2.01158500 | 1.75756200  | 1.50375100  |
| H  | -1.88437800 | 1.17855200  | 2.39509500  | -1.85543500 | 1.15665300  | 2.39405100  |
| C  | -2.84251600 | 2.90223600  | 1.58940600  | -2.84826200 | 2.86507900  | 1.58481500  |
| H  | -3.33348200 | 3.14536000  | 2.52504700  | -3.33324700 | 3.11288200  | 2.52196900  |
| C  | -3.02566100 | 3.69942900  | 0.46020600  | -3.05060600 | 3.64471500  | 0.44749900  |
| C  | -2.40753800 | 3.39676400  | -0.74440500 | -2.43895600 | 3.34328800  | -0.76092500 |
| H  | -2.56476300 | 4.02756300  | -1.61160400 | -2.61215100 | 3.96614500  | -1.63037100 |
| S  | -4.86184900 | -4.56811700 | -0.43700300 | -4.86590700 | -4.55114600 | -0.43217000 |
| F  | -5.49546900 | -4.11677700 | 0.98318600  | -5.53110400 | -4.07112700 | 0.96274500  |
| F  | -5.89658000 | -3.59128300 | -1.20856900 | -5.85601300 | -3.55958900 | -1.24160300 |
| F  | -4.34696400 | -5.13714100 | -1.86227400 | -4.31644900 | -5.14506000 | -1.83376900 |
| F  | -3.94519300 | -5.66131100 | 0.32947500  | -3.99323500 | -5.65197900 | 0.37124400  |
| F  | -6.01729200 | -5.70165500 | -0.49588300 | -6.04107300 | -5.66109200 | -0.51587200 |
| O  | 1.33637700  | -1.64149500 | -0.61699400 | 1.38275000  | -1.62483700 | -0.57240600 |
| N  | -0.20997000 | -0.83692800 | 1.88336300  | -0.18303200 | -0.81873200 | 1.87973900  |
| C  | -1.12815800 | -1.82203200 | 2.06187300  | -1.15978700 | -1.81452900 | 2.06672700  |
| C  | -1.27609100 | -2.42207800 | 3.31242200  | -1.31993200 | -2.38466400 | 3.36519100  |
| H  | -2.01041700 | -3.20701400 | 3.45458800  | -2.07676600 | -3.14756600 | 3.51655800  |
| C  | -0.48589100 | -2.00523600 | 4.37407600  | -0.53733200 | -1.96954700 | 4.40593400  |
| H  | -0.59862400 | -2.46595400 | 5.35065000  | -0.66214400 | -2.40010600 | 5.39467500  |



|   |             |             |             |             |             |             |
|---|-------------|-------------|-------------|-------------|-------------|-------------|
| C | 0.44617200  | -0.99059600 | 4.17087200  | 0.44245100  | -0.96242700 | 4.18071200  |
| H | 1.08293400  | -0.63445500 | 4.97293500  | 1.08371000  | -0.60774300 | 4.97931800  |
| C | 0.55576100  | -0.43304400 | 2.90734000  | 0.57463900  | -0.42922000 | 2.90949500  |
| H | 1.25943600  | 0.35736100  | 2.67039600  | 1.30053200  | 0.34376100  | 2.67986700  |
| C | -1.90081600 | -2.12544400 | 0.85710600  | -1.88256300 | -2.12459700 | 0.91040800  |
| C | -1.58083400 | -1.33856300 | -0.28066800 | -1.54399500 | -1.35964500 | -0.29671400 |
| C | -2.31483800 | -1.57829700 | -1.45175600 | -2.25381400 | -1.61389200 | -1.47140800 |
| H | -2.11183000 | -0.99919200 | -2.34779600 | -2.02308400 | -1.05040200 | -2.37095300 |
| C | -3.30550400 | -2.55161100 | -1.51004200 | -3.25397500 | -2.58000500 | -1.53891700 |
| H | -3.85364000 | -2.71485100 | -2.43114200 | -3.78453700 | -2.77185500 | -2.46207200 |
| C | -3.58128700 | -3.30947600 | -0.37271500 | -3.55668700 | -3.30497800 | -0.35621300 |
| C | -2.89063500 | -3.10772100 | 0.81353800  | -2.91840600 | -3.10920800 | 0.83675000  |
| H | -3.12197300 | -3.70613100 | 1.68707200  | -3.18982300 | -3.68647100 | 1.71195900  |
| P | 3.01150800  | 1.23810600  | 0.02810300  | 3.00681600  | 1.26127800  | 0.04486500  |
| P | 2.85211500  | -1.59099500 | -0.33080400 | 2.90478700  | -1.56956100 | -0.30918800 |
| N | 3.60992700  | -0.17839100 | -0.44136200 | 3.64324300  | -0.14553600 | -0.39808700 |
| C | 3.65370000  | -2.68750000 | -1.53148100 | 3.69114600  | -2.63022400 | -1.55015000 |
| C | 5.00058700  | -2.51560000 | -1.86835700 | 5.02610100  | -2.42869600 | -1.91674600 |
| C | 2.92499300  | -3.73294700 | -2.10880000 | 2.96480800  | -3.67638800 | -2.12931200 |
| C | 5.61113700  | -3.38123900 | -2.77179100 | 5.62749400  | -3.26627200 | -2.85212100 |
| H | 5.56159600  | -1.69525700 | -1.42931700 | 5.58439200  | -1.60758800 | -1.47572400 |
| C | 3.53792200  | -4.59626700 | -3.01388000 | 3.56883600  | -4.51130500 | -3.06633100 |
| H | 1.87542300  | -3.85883800 | -1.85808500 | 1.92405200  | -3.82516400 | -1.85528700 |
| C | 4.88100400  | -4.42256200 | -3.34381600 | 4.90012000  | -4.30838100 | -3.42616800 |
| H | 6.65655200  | -3.24116600 | -3.03299100 | 6.66345400  | -3.10351200 | -3.13663900 |
| H | 2.96572200  | -5.40274300 | -3.46426000 | 2.99875700  | -5.31840400 | -3.51818100 |
| H | 5.35839900  | -5.09650400 | -4.05003500 | 5.37035800  | -4.96024000 | -4.15743000 |
| C | 3.14188800  | -2.34591300 | 1.29976900  | 3.22605300  | -2.35677000 | 1.29780800  |
| C | 4.18156100  | -1.90097900 | 2.12183700  | 4.25920500  | -1.90471300 | 2.12383000  |
| C | 2.33613700  | -3.41011500 | 1.72280700  | 2.45008900  | -3.45136100 | 1.69853000  |
| C | 4.41109200  | -2.50998600 | 3.35395600  | 4.51321100  | -2.53889400 | 3.33833000  |
| H | 4.80011200  | -1.06861300 | 1.79734900  | 4.85248400  | -1.04772200 | 1.81666800  |
| C | 2.56801200  | -4.01862800 | 2.95248400  | 2.70803900  | -4.08592800 | 2.90961600  |
| H | 1.51885700  | -3.74995400 | 1.09251300  | 1.63464200  | -3.79387000 | 1.06739300  |
| C | 3.60675600  | -3.56985500 | 3.76845400  | 3.74054900  | -3.63052700 | 3.72992000  |
| H | 5.21714700  | -2.15566900 | 3.99086100  | 5.31359000  | -2.17937300 | 3.97938700  |
| H | 1.93595900  | -4.84045900 | 3.27781600  | 2.09985600  | -4.93189700 | 3.21806700  |
| H | 3.78648700  | -4.04506000 | 4.72911600  | 3.93981000  | -4.12539600 | 4.67666800  |
| C | 3.13656800  | 2.37543200  | -1.38334600 | 3.13068400  | 2.39201600  | -1.37041200 |
| C | 2.43307500  | 3.58551700  | -1.35574200 | 2.40222300  | 3.58764500  | -1.36275100 |
| C | 3.94909600  | 2.07414400  | -2.48034800 | 3.96458300  | 2.09750200  | -2.45318200 |
| C | 2.54034100  | 4.48131700  | -2.41568300 | 2.50616400  | 4.47597400  | -2.42918000 |
| H | 1.79326300  | 3.81937600  | -0.50869800 | 1.74621500  | 3.81677600  | -0.52684500 |
| C | 4.05659500  | 2.97307100  | -3.53923800 | 4.06886300  | 2.98960400  | -3.51809000 |

|   |            |            |             |            |            |             |
|---|------------|------------|-------------|------------|------------|-------------|
| H | 4.48261800 | 1.12797200 | -2.50029600 | 4.51735400 | 1.16225900 | -2.45762900 |
| C | 3.35357700 | 4.17615300 | -3.50707700 | 3.34082700 | 4.17801100 | -3.50632800 |
| H | 1.98761200 | 5.41655000 | -2.39235200 | 1.93432900 | 5.39985700 | -2.42189700 |
| H | 4.68670100 | 2.73284900 | -4.39137700 | 4.71575600 | 2.75515300 | -4.35910800 |
| H | 3.43699100 | 4.87639900 | -4.33390700 | 3.42154000 | 4.87269200 | -4.33805800 |
| C | 4.09247400 | 1.94492000 | 1.30662300  | 4.03559400 | 1.99667400 | 1.34719300  |
| C | 5.47316400 | 1.71768800 | 1.27279500  | 5.42087000 | 1.79599200 | 1.34792200  |
| C | 3.54911100 | 2.74113100 | 2.31995900  | 3.45118900 | 2.78667700 | 2.34244900  |
| C | 6.29877200 | 2.27666200 | 2.24421600  | 6.21095600 | 2.37583300 | 2.33625500  |
| H | 5.89671700 | 1.09357500 | 0.49001000  | 5.87572200 | 1.17663900 | 0.57904200  |
| C | 4.37735600 | 3.29829600 | 3.29209100  | 4.24448900 | 3.36421800 | 3.33163400  |
| H | 2.47664500 | 2.91198500 | 2.34859600  | 2.37517900 | 2.93674400 | 2.34496800  |
| C | 5.75117800 | 3.06762100 | 3.25427000  | 5.62307300 | 3.16045500 | 3.32842800  |
| H | 7.36934600 | 2.09321300 | 2.21561700  | 7.28524400 | 2.21337900 | 2.33490600  |
| H | 3.94911800 | 3.91076400 | 4.08090600  | 3.78511400 | 3.97146800 | 4.10676400  |
| H | 6.39611900 | 3.50214800 | 4.01322000  | 6.24046200 | 3.61101200 | 4.10077500  |
